# Supplementary figures and images for: Co-Expression Network Analysis and Hub Gene Selection for High-Quality Fiber in Upland Cotton (Gossypium hirsutum) Using RNA Sequencing Analysis
Source: MDPI journal article supplement (doi:10.3390/genes10020119), 2019-02-06

a

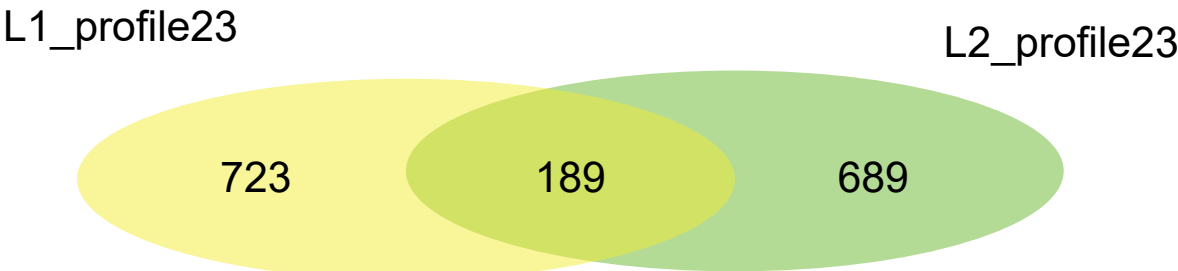

b

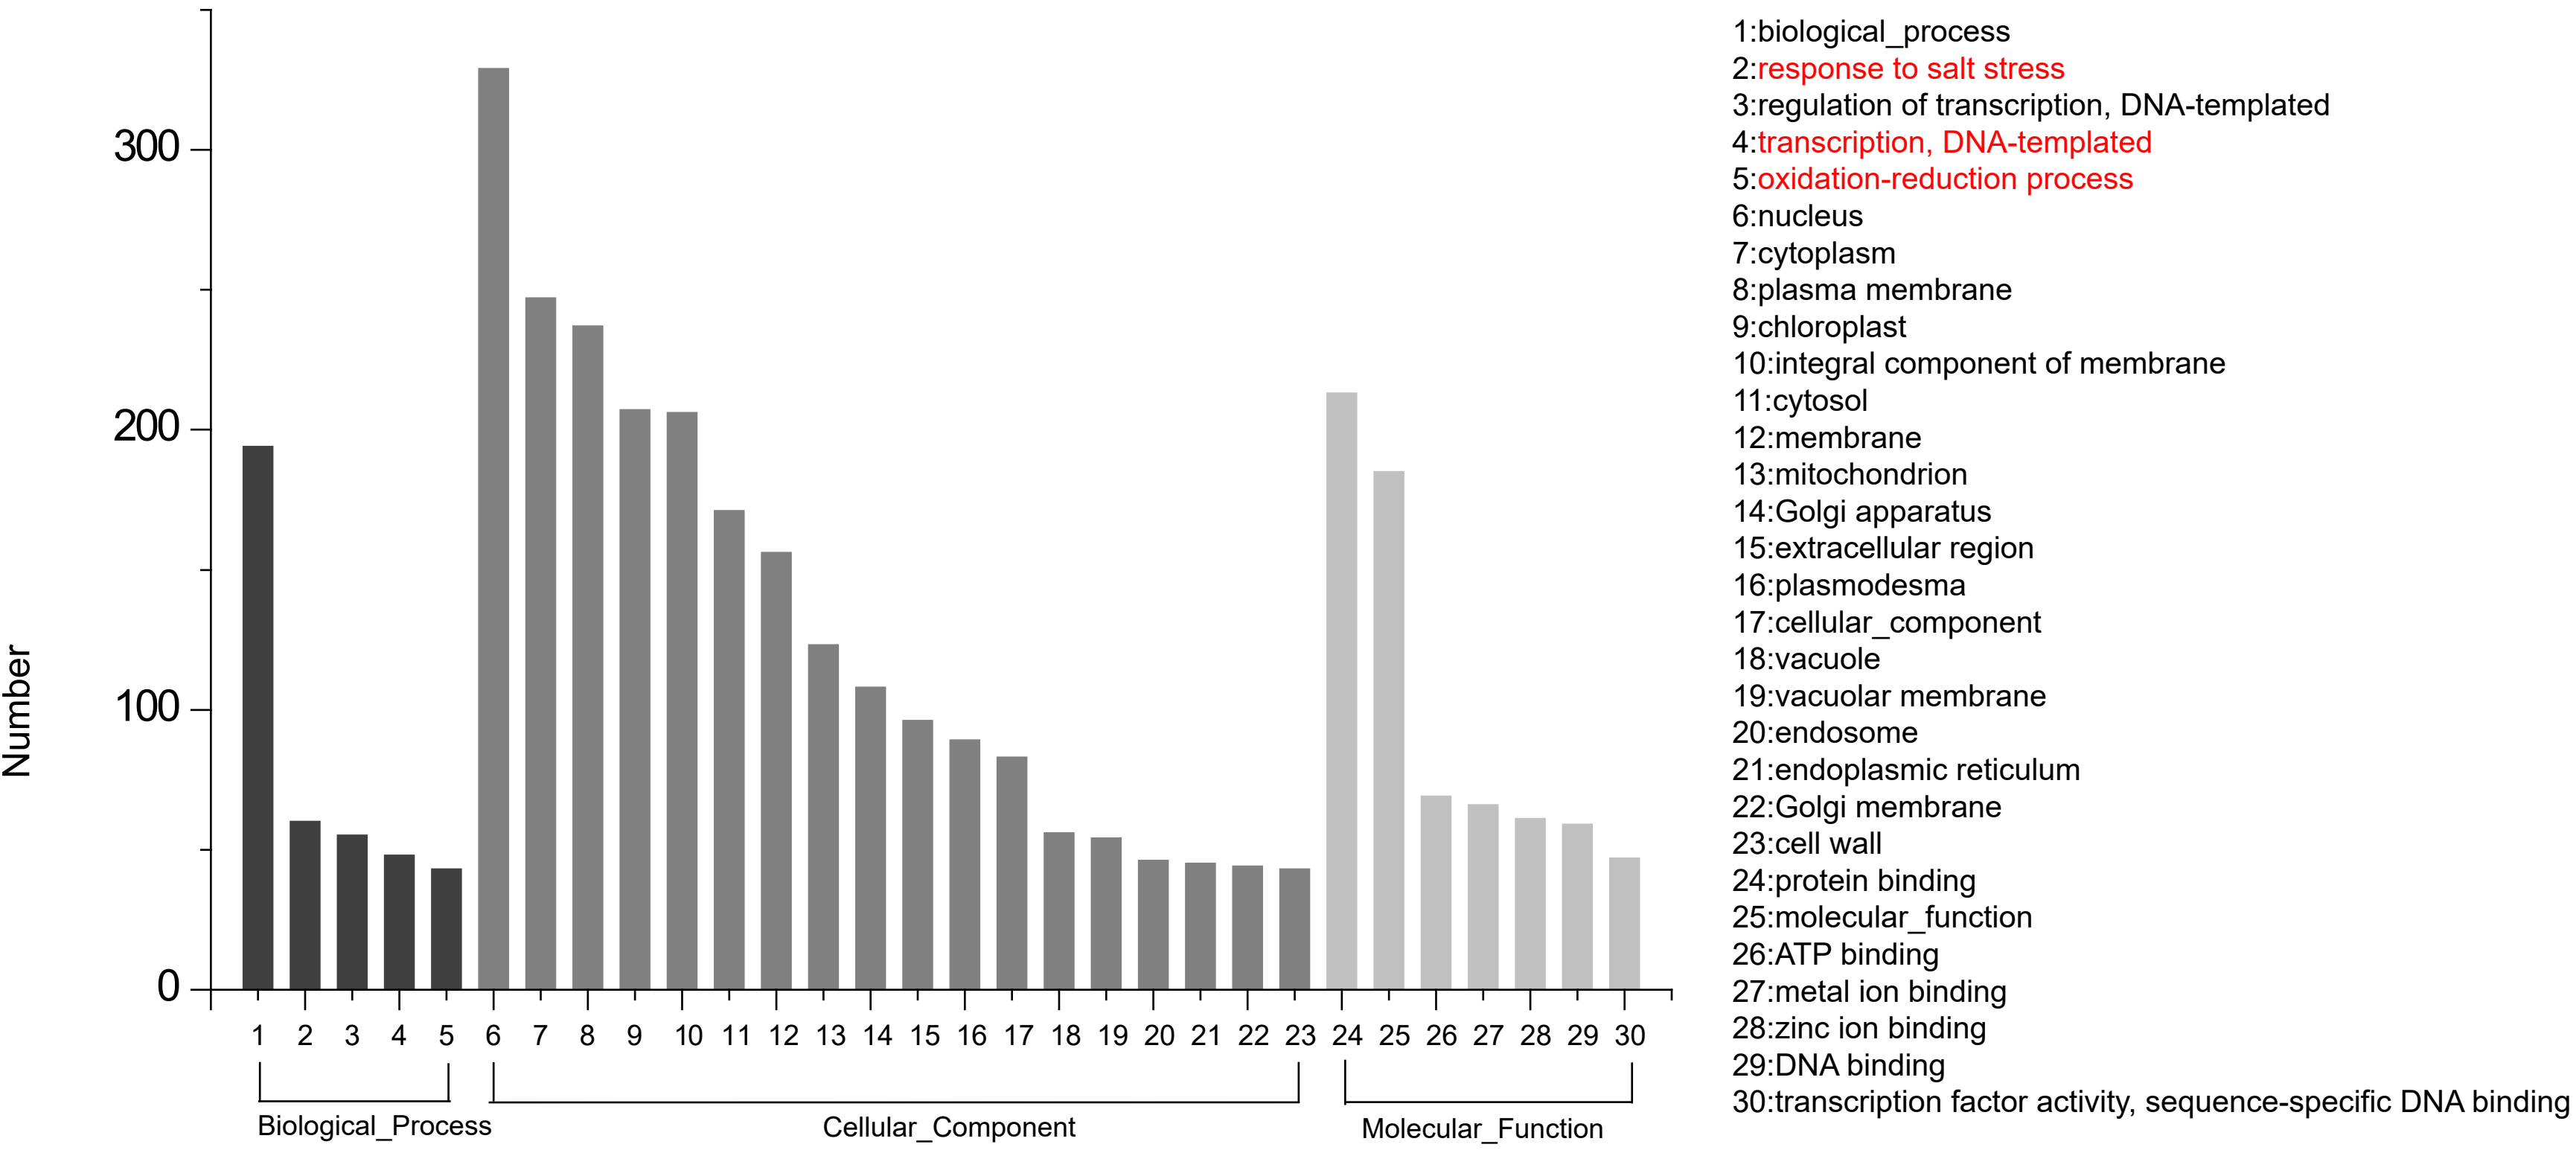

c

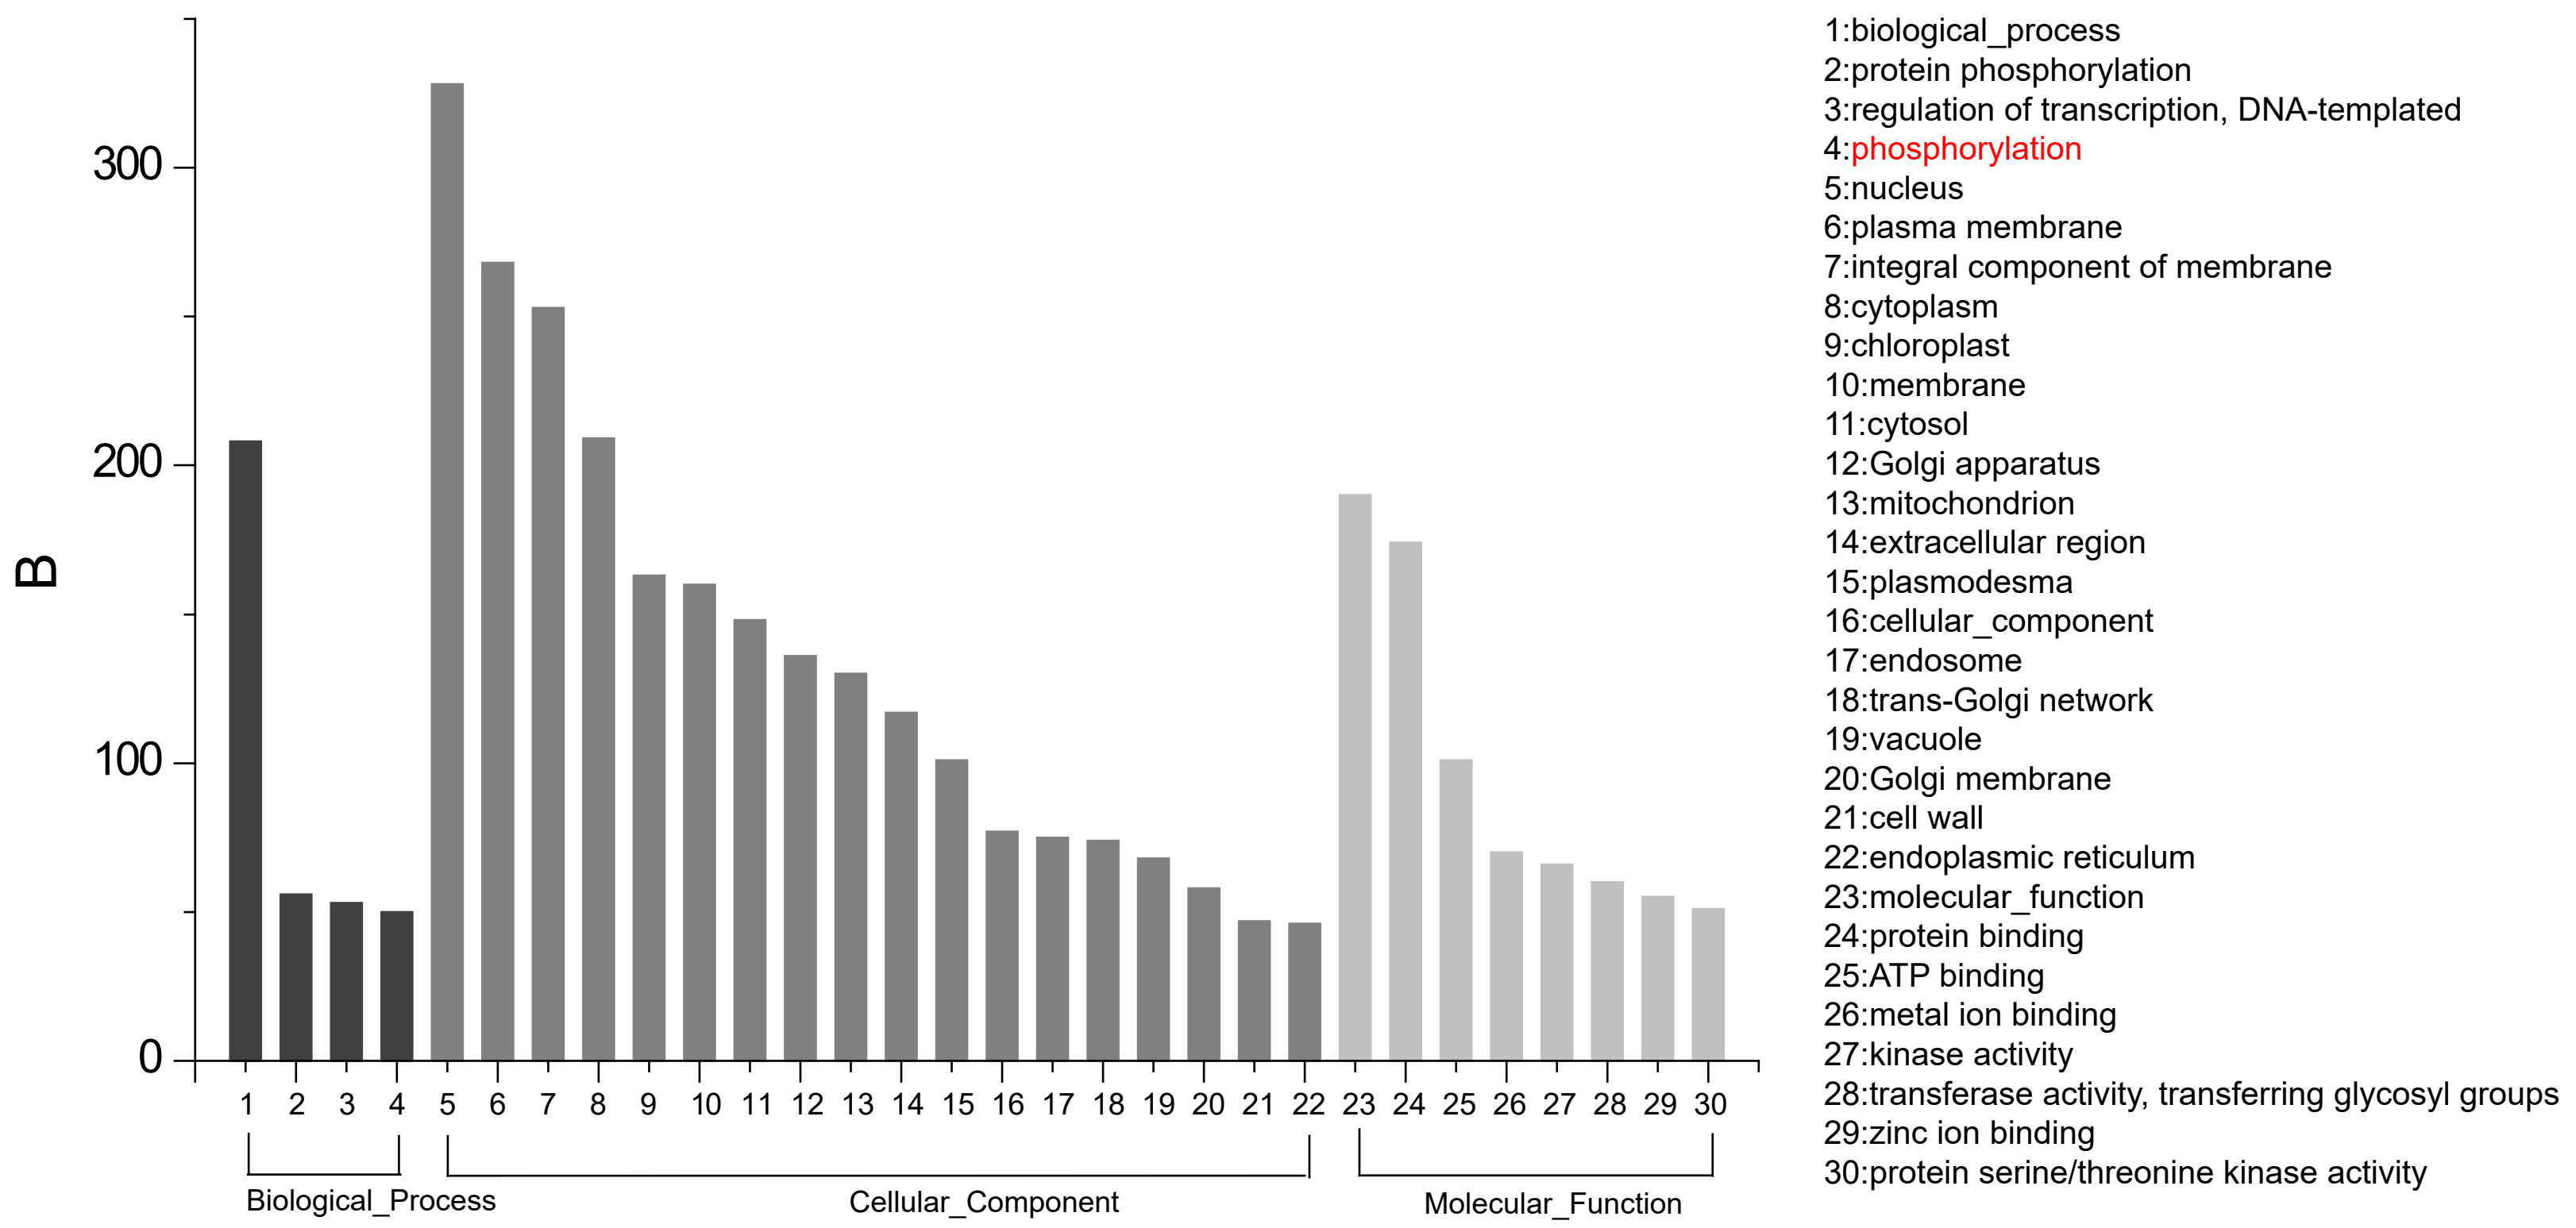

Supplement: s1 [file s1]

a

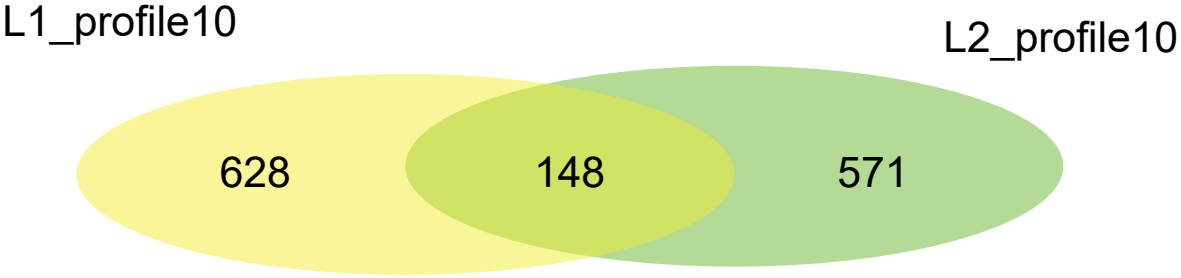

b

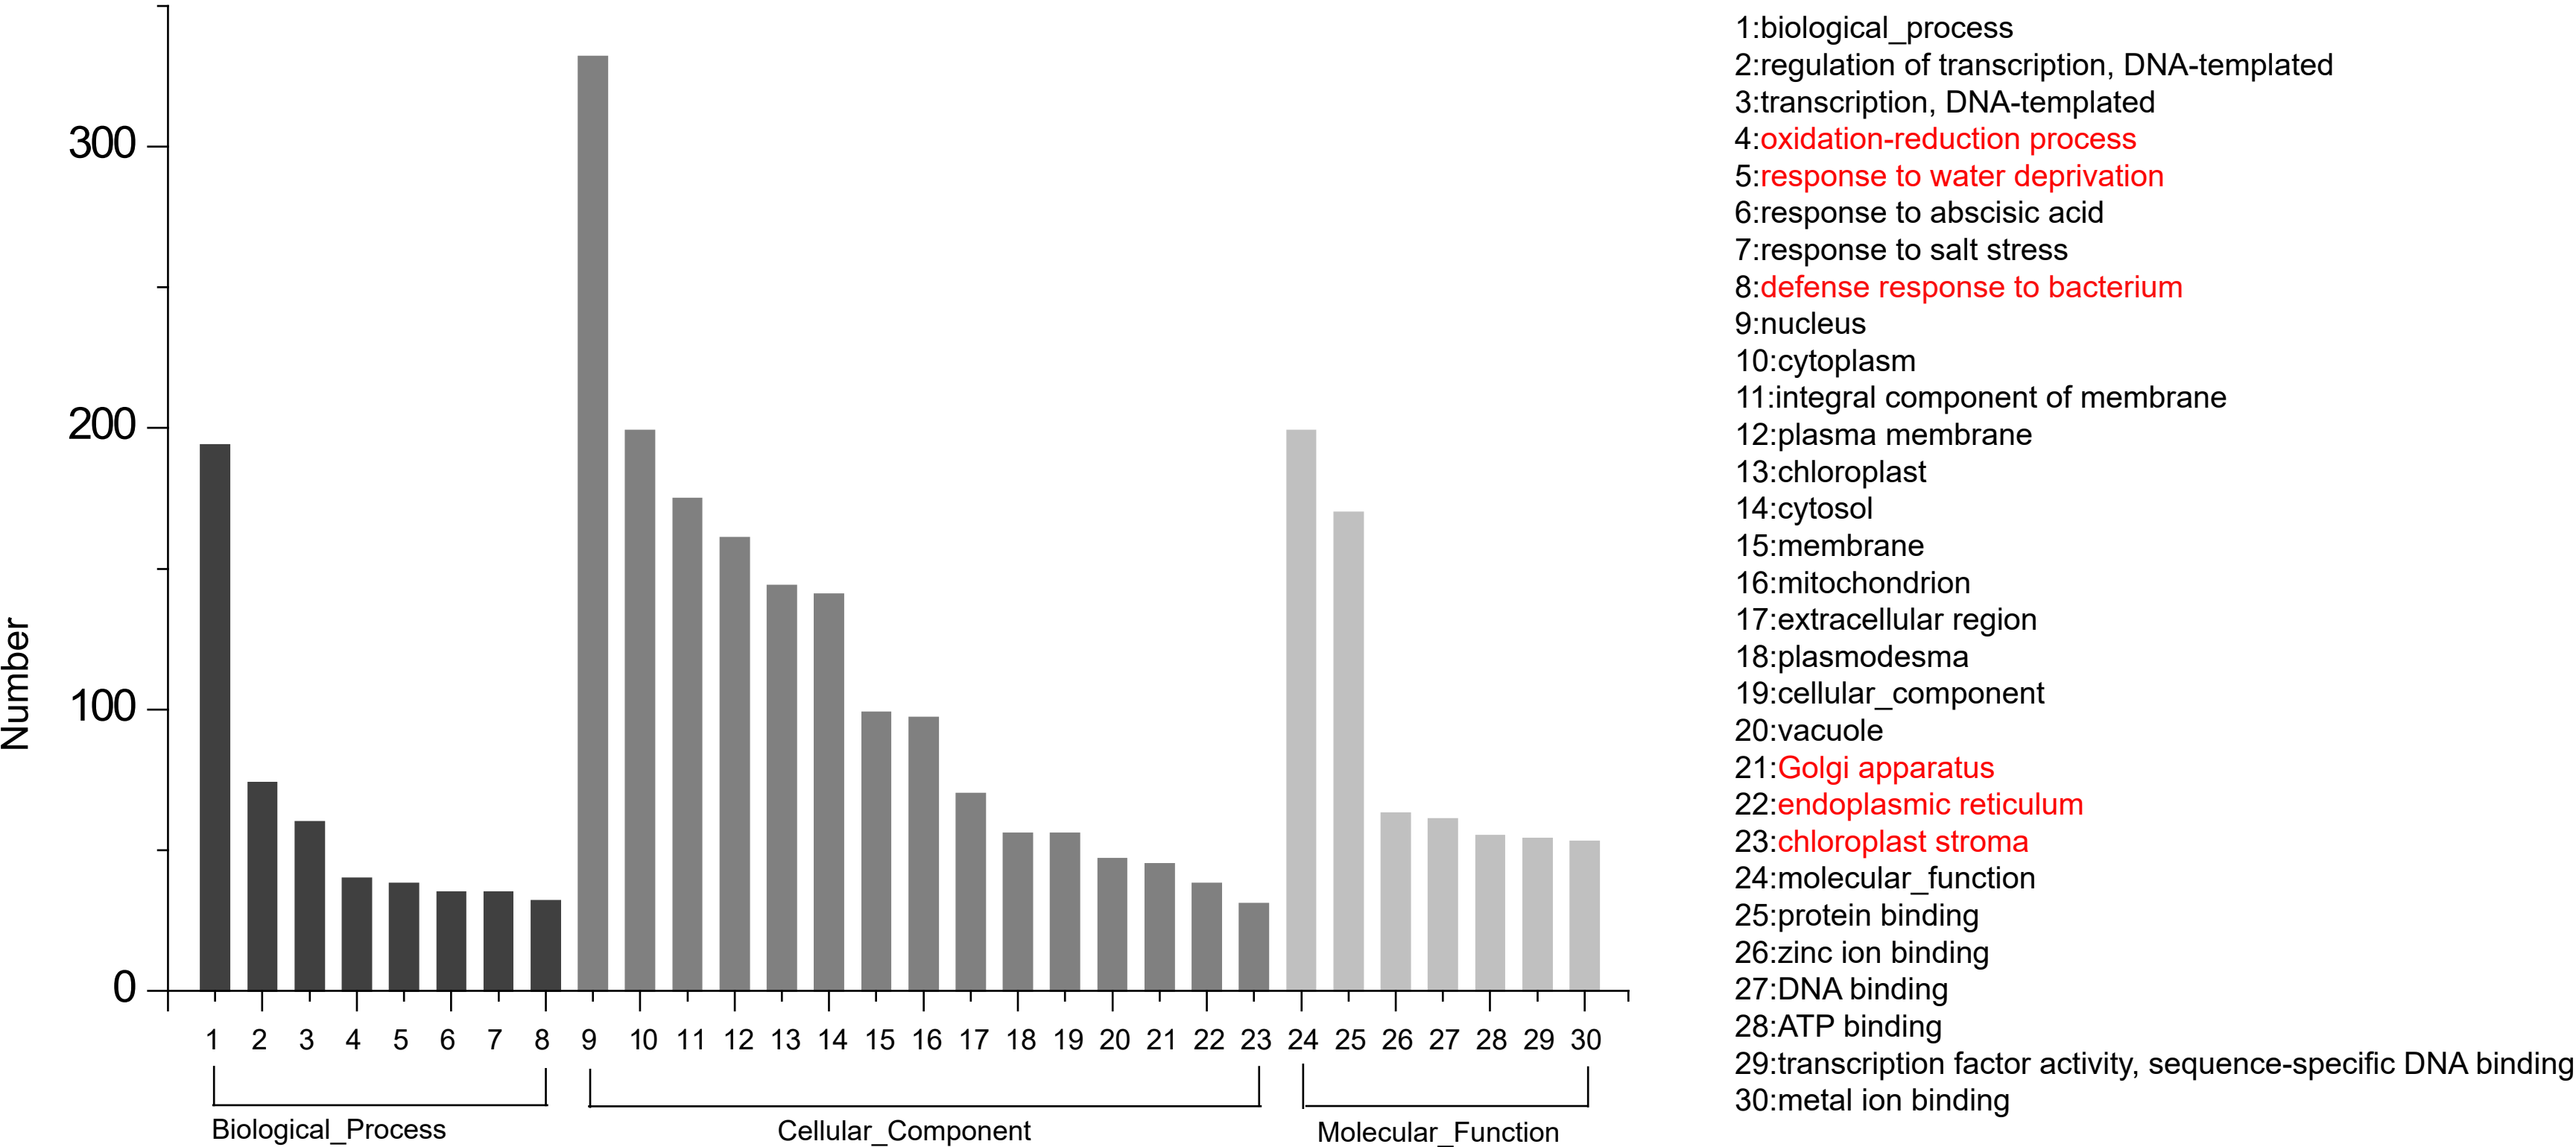

c

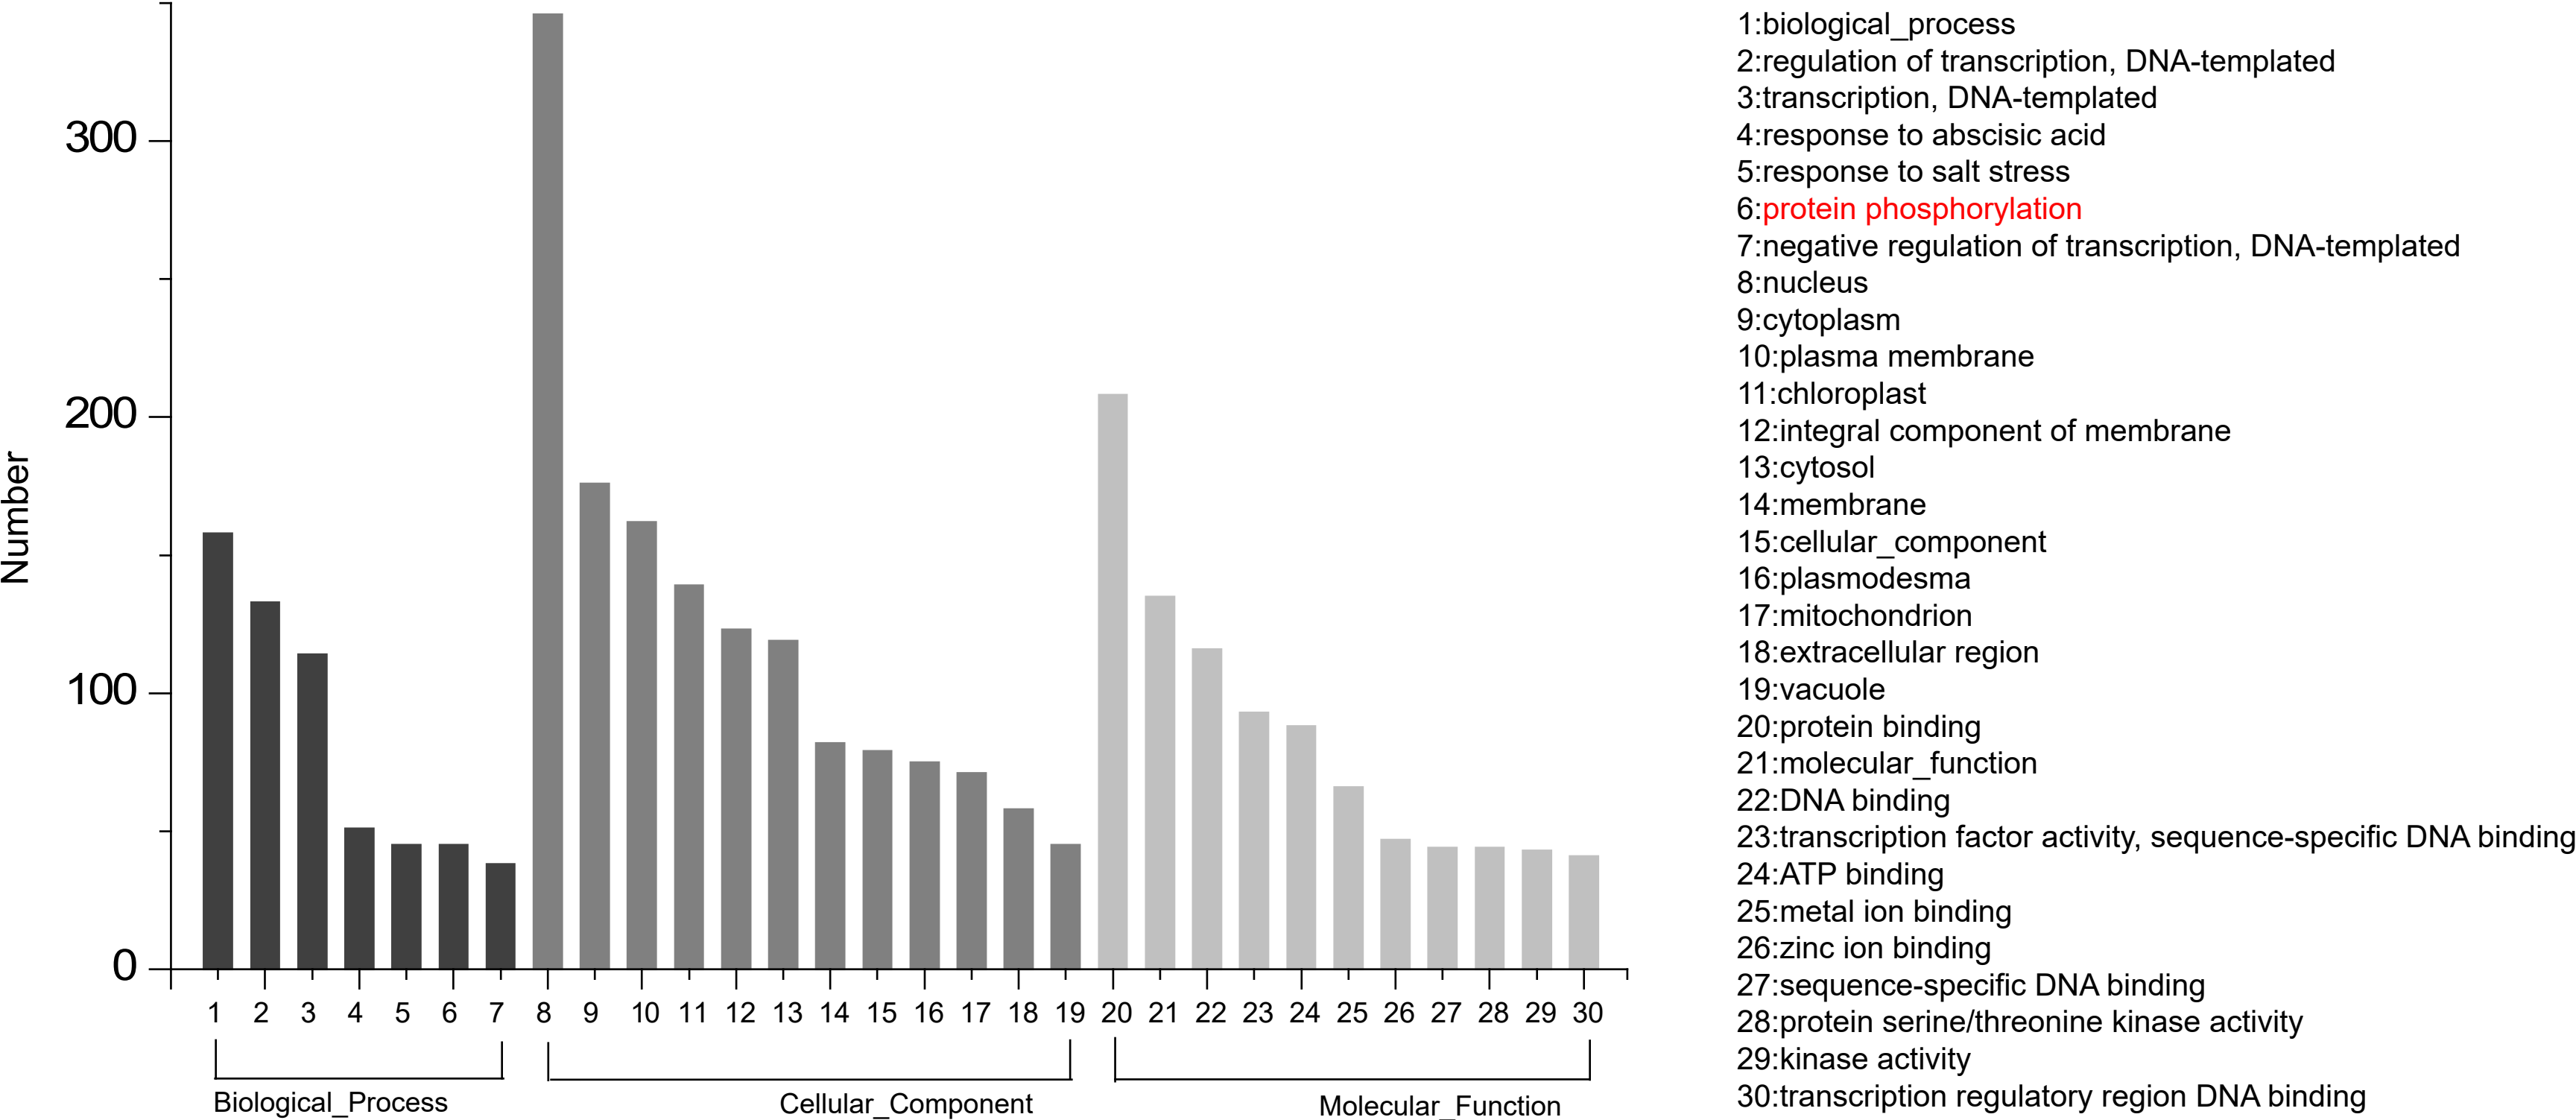

Supplement: s1 [file s1]

a

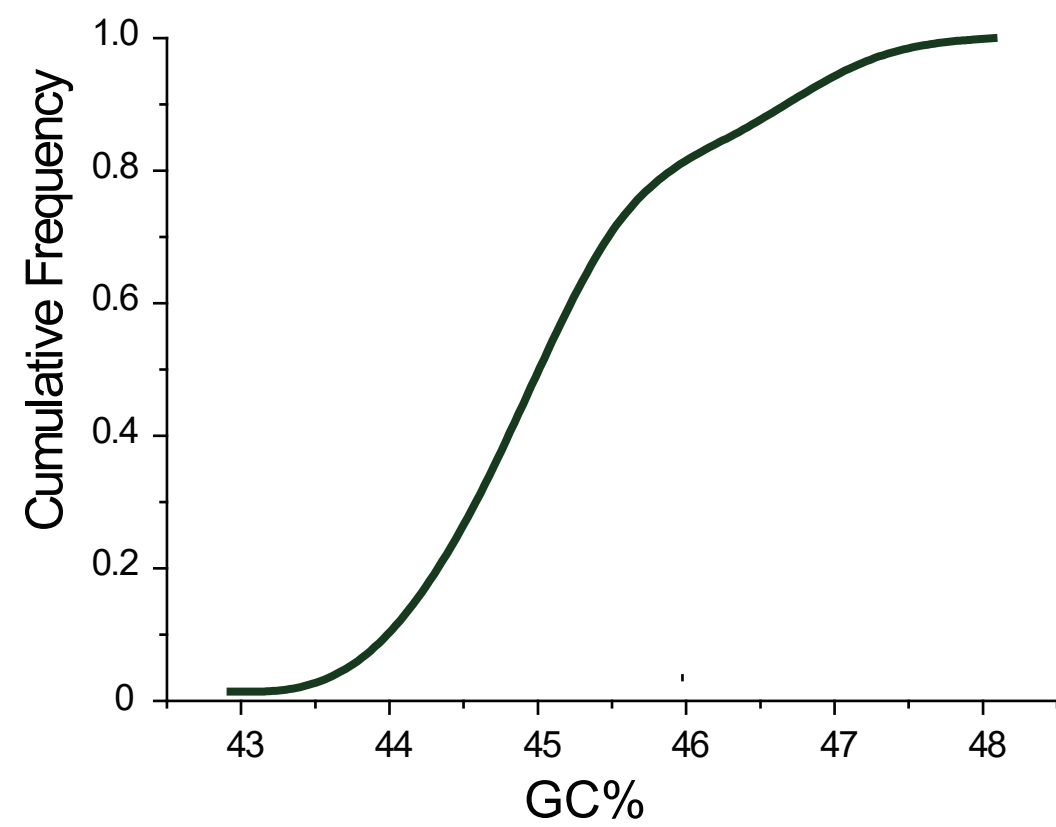

b

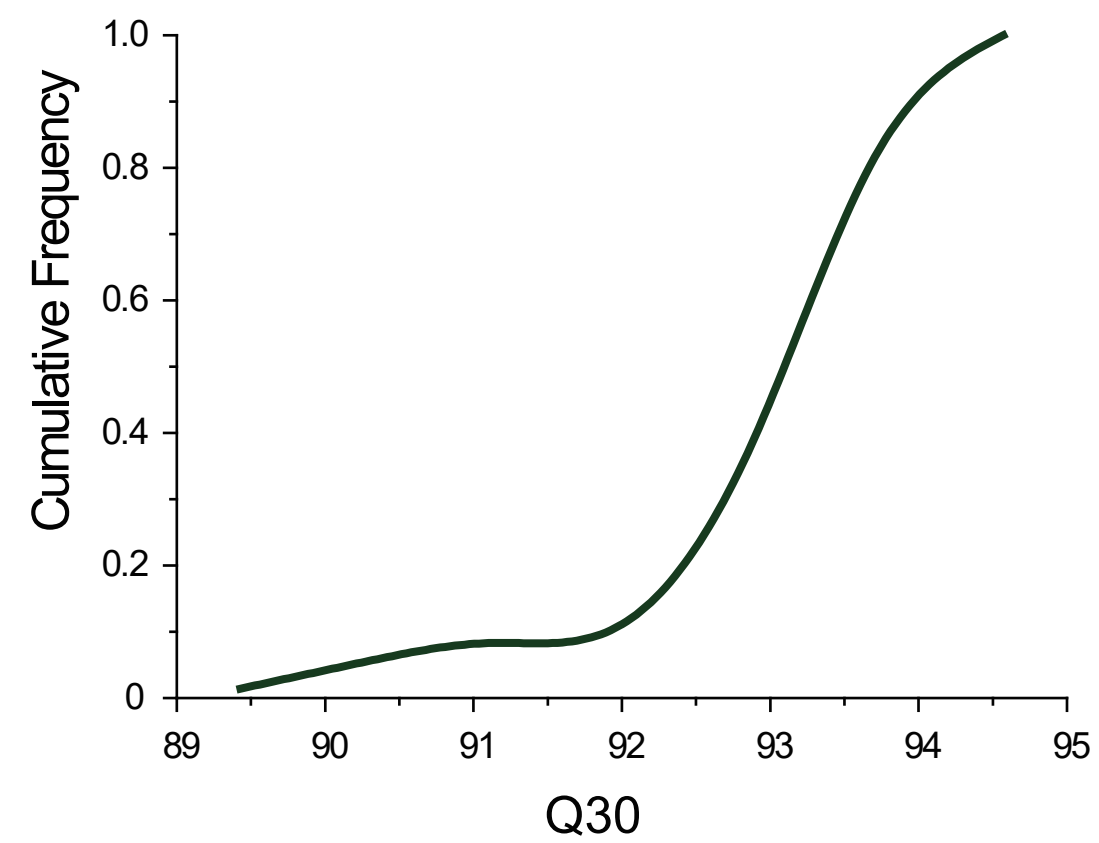

c

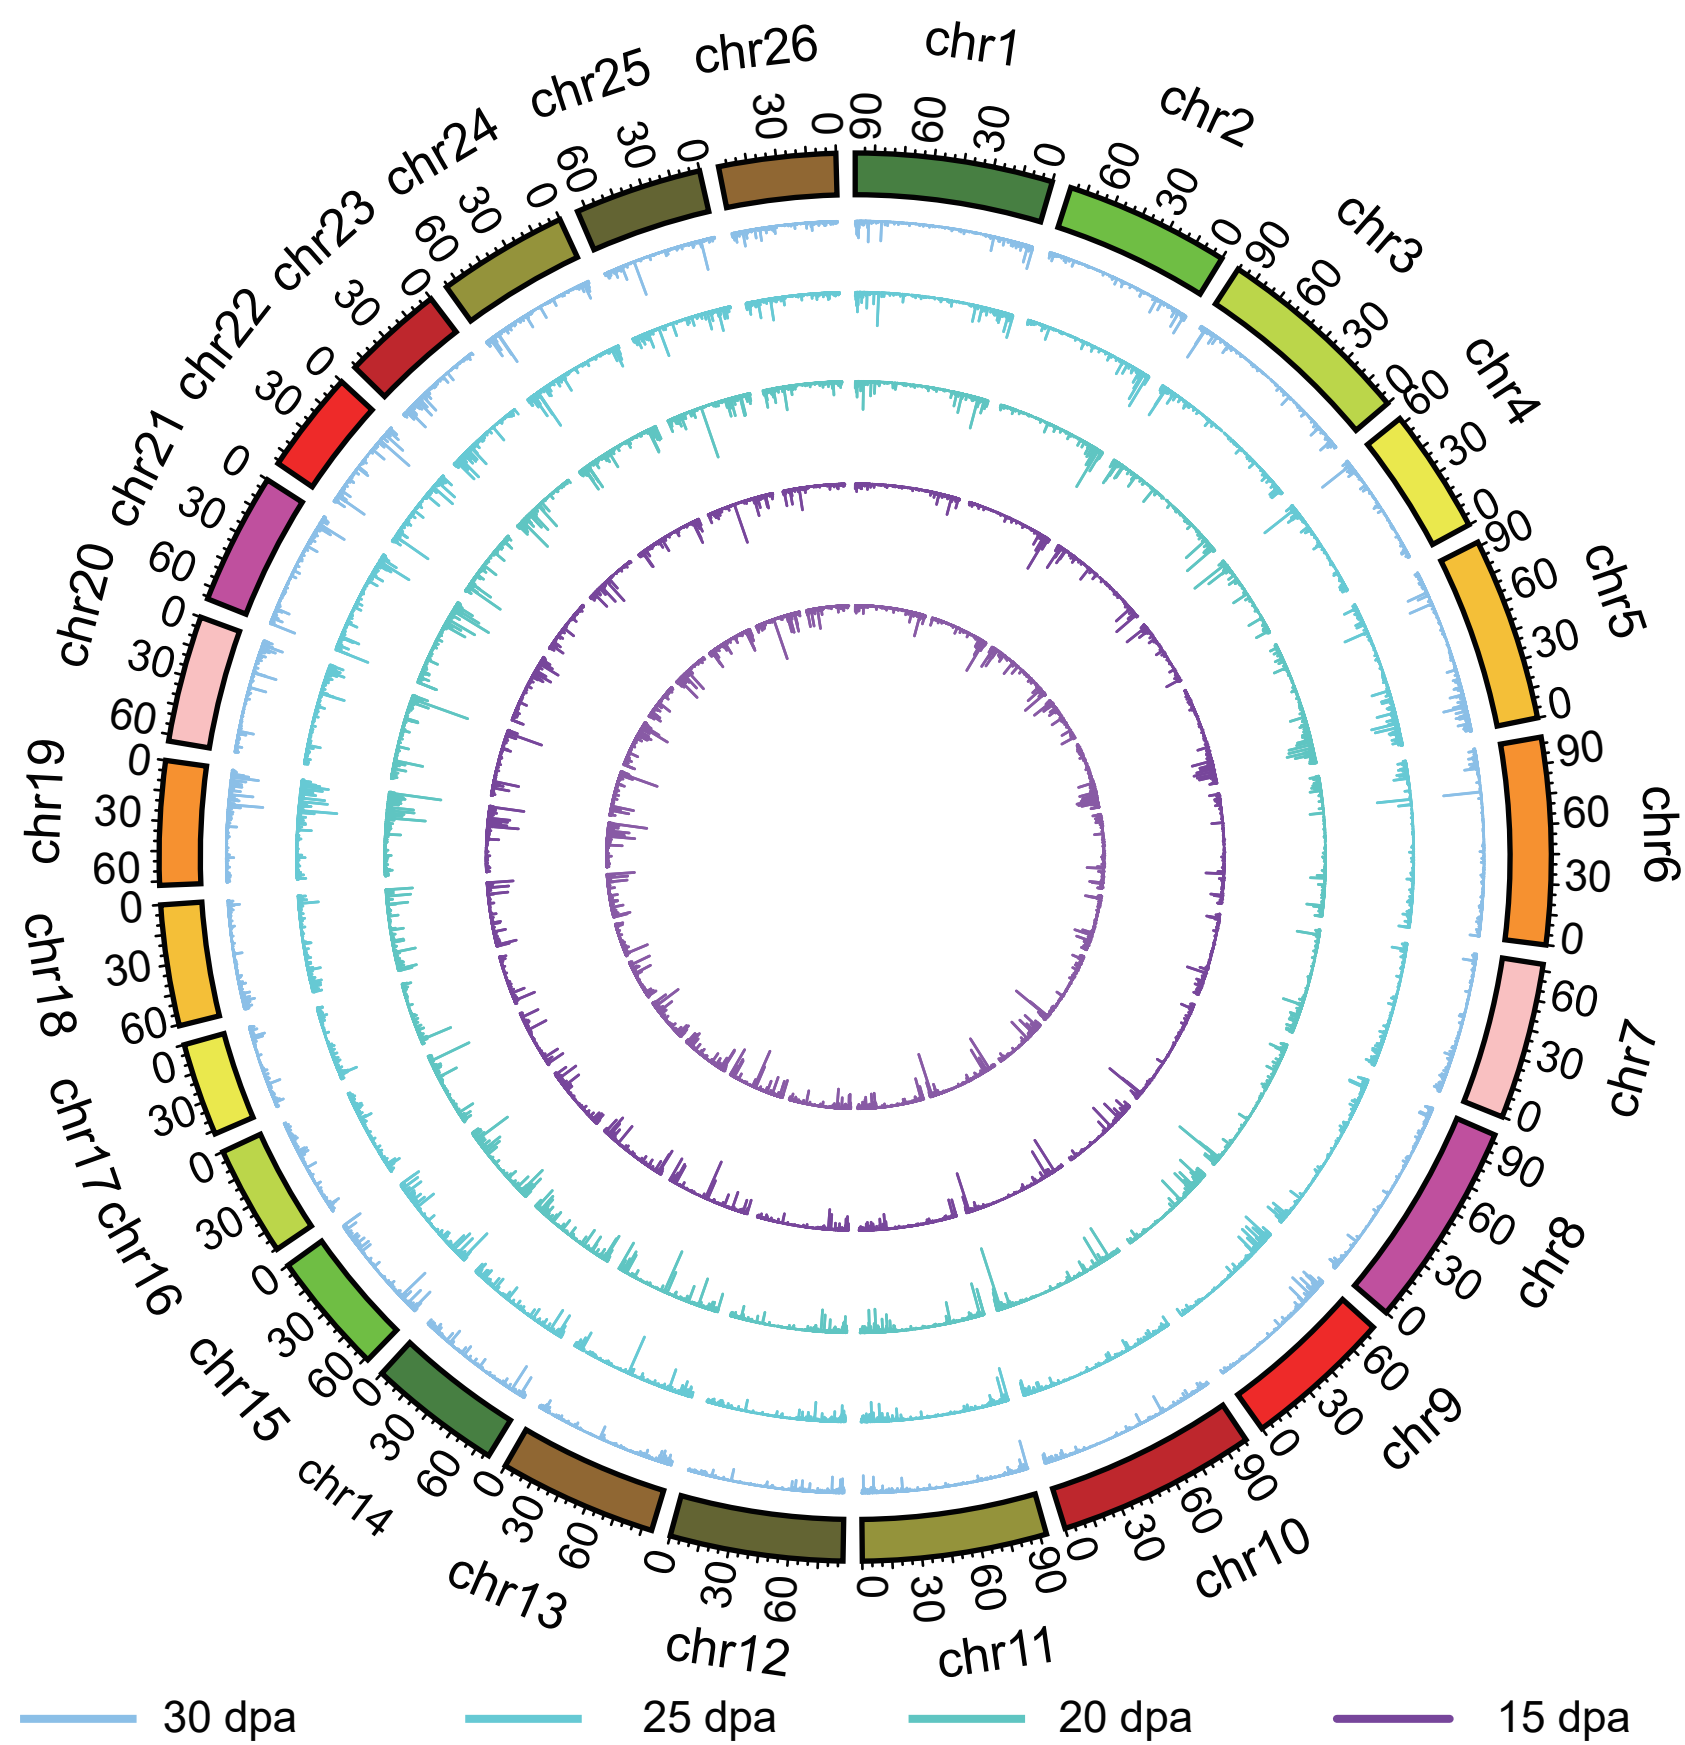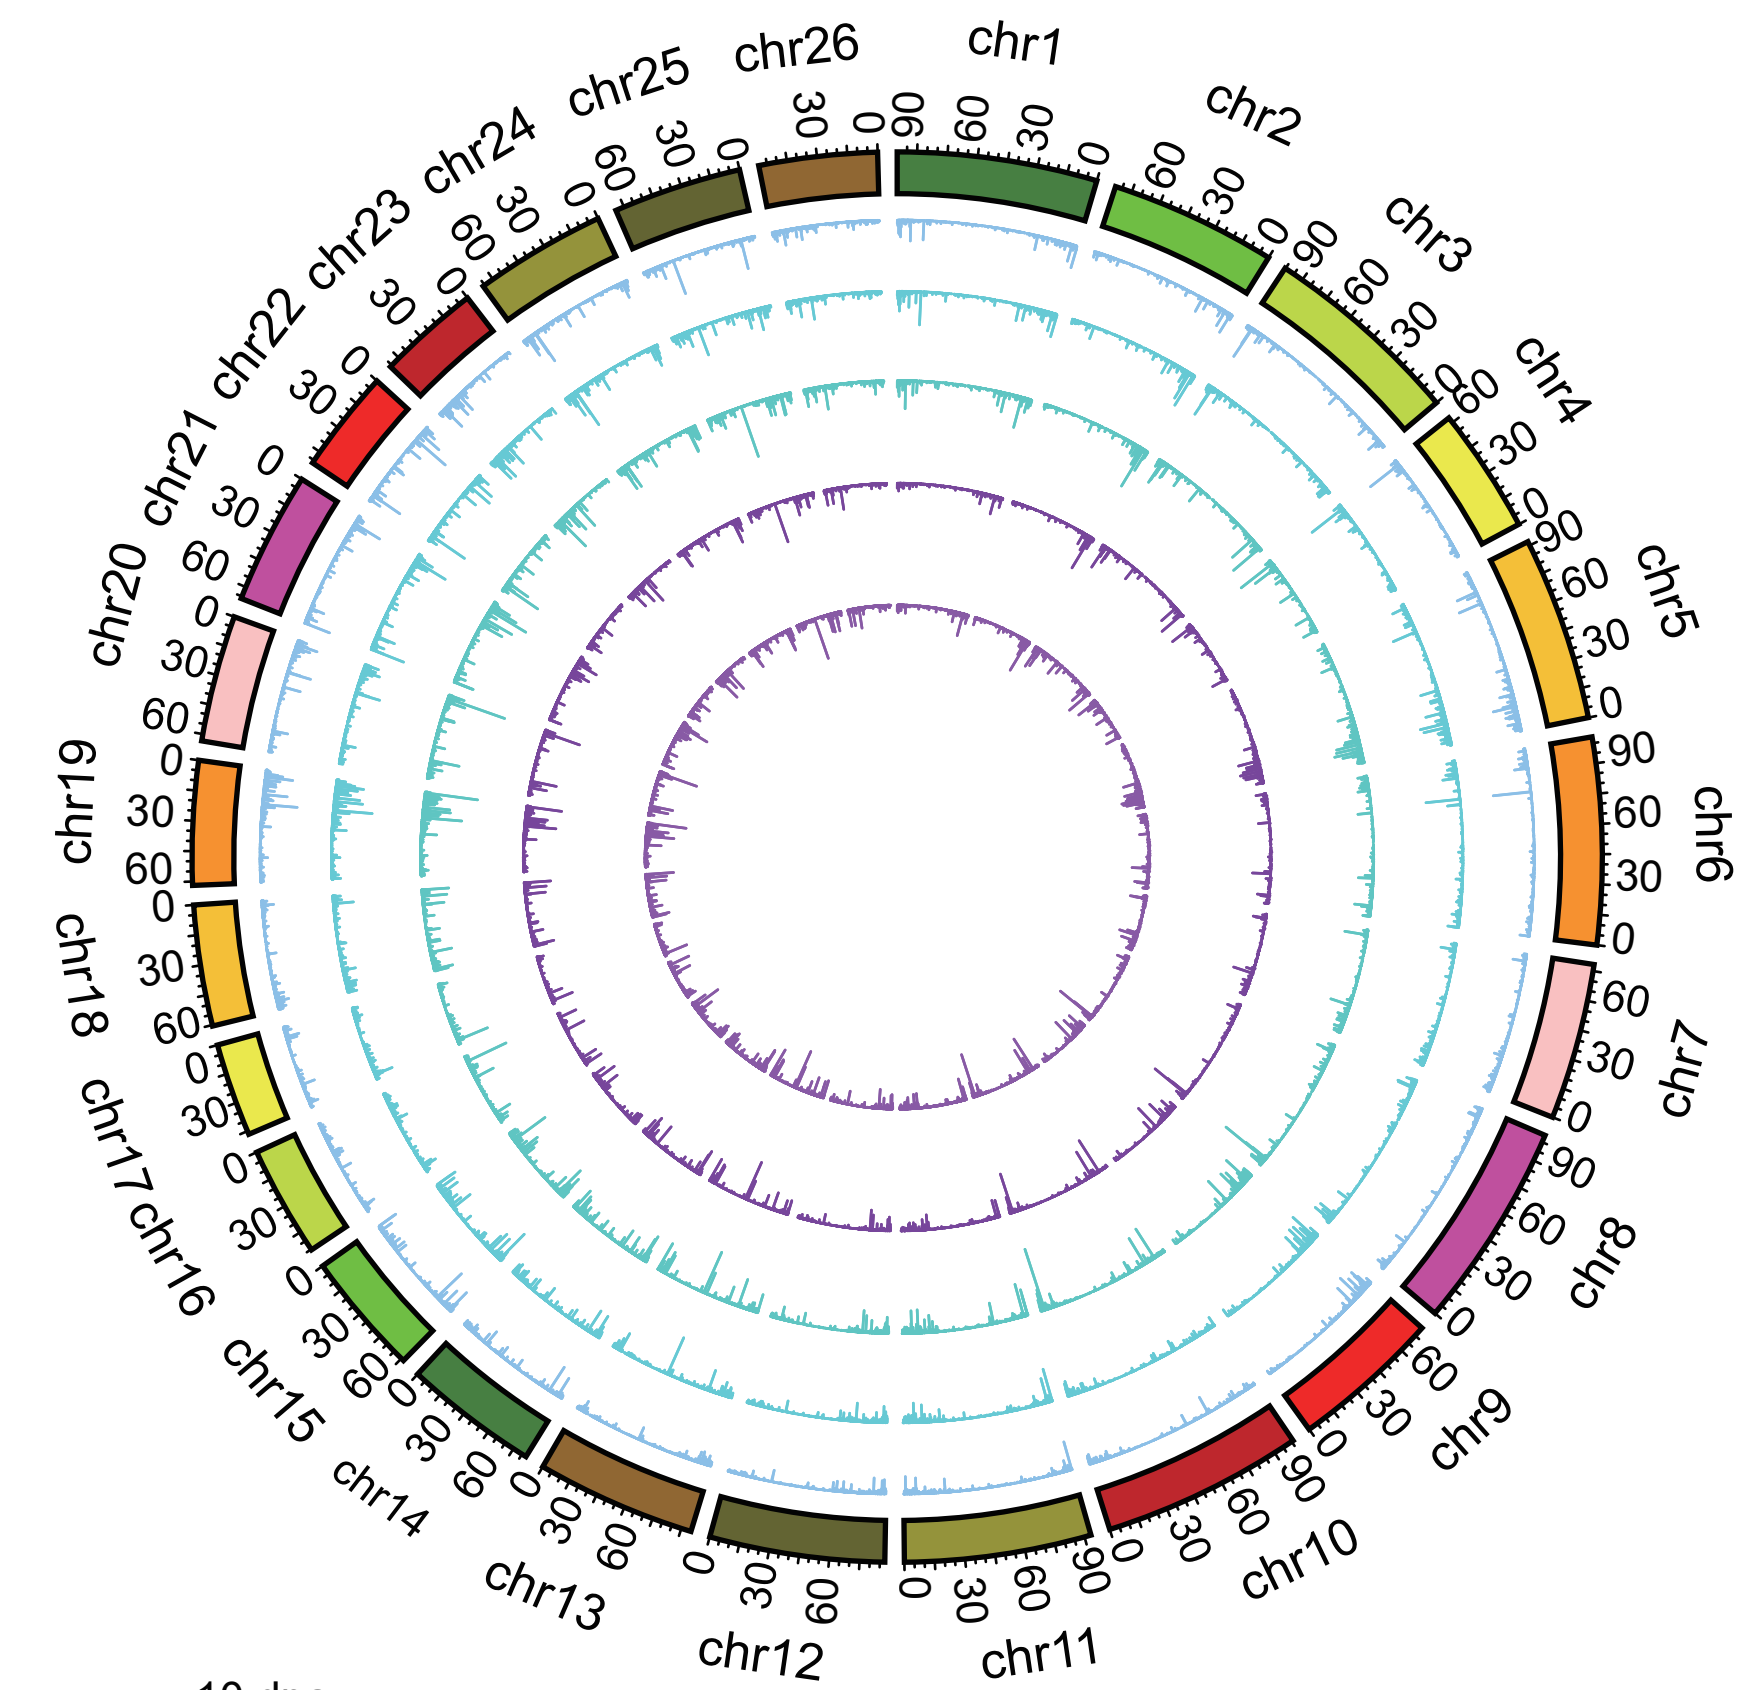

Supplement: s1 [file s1]

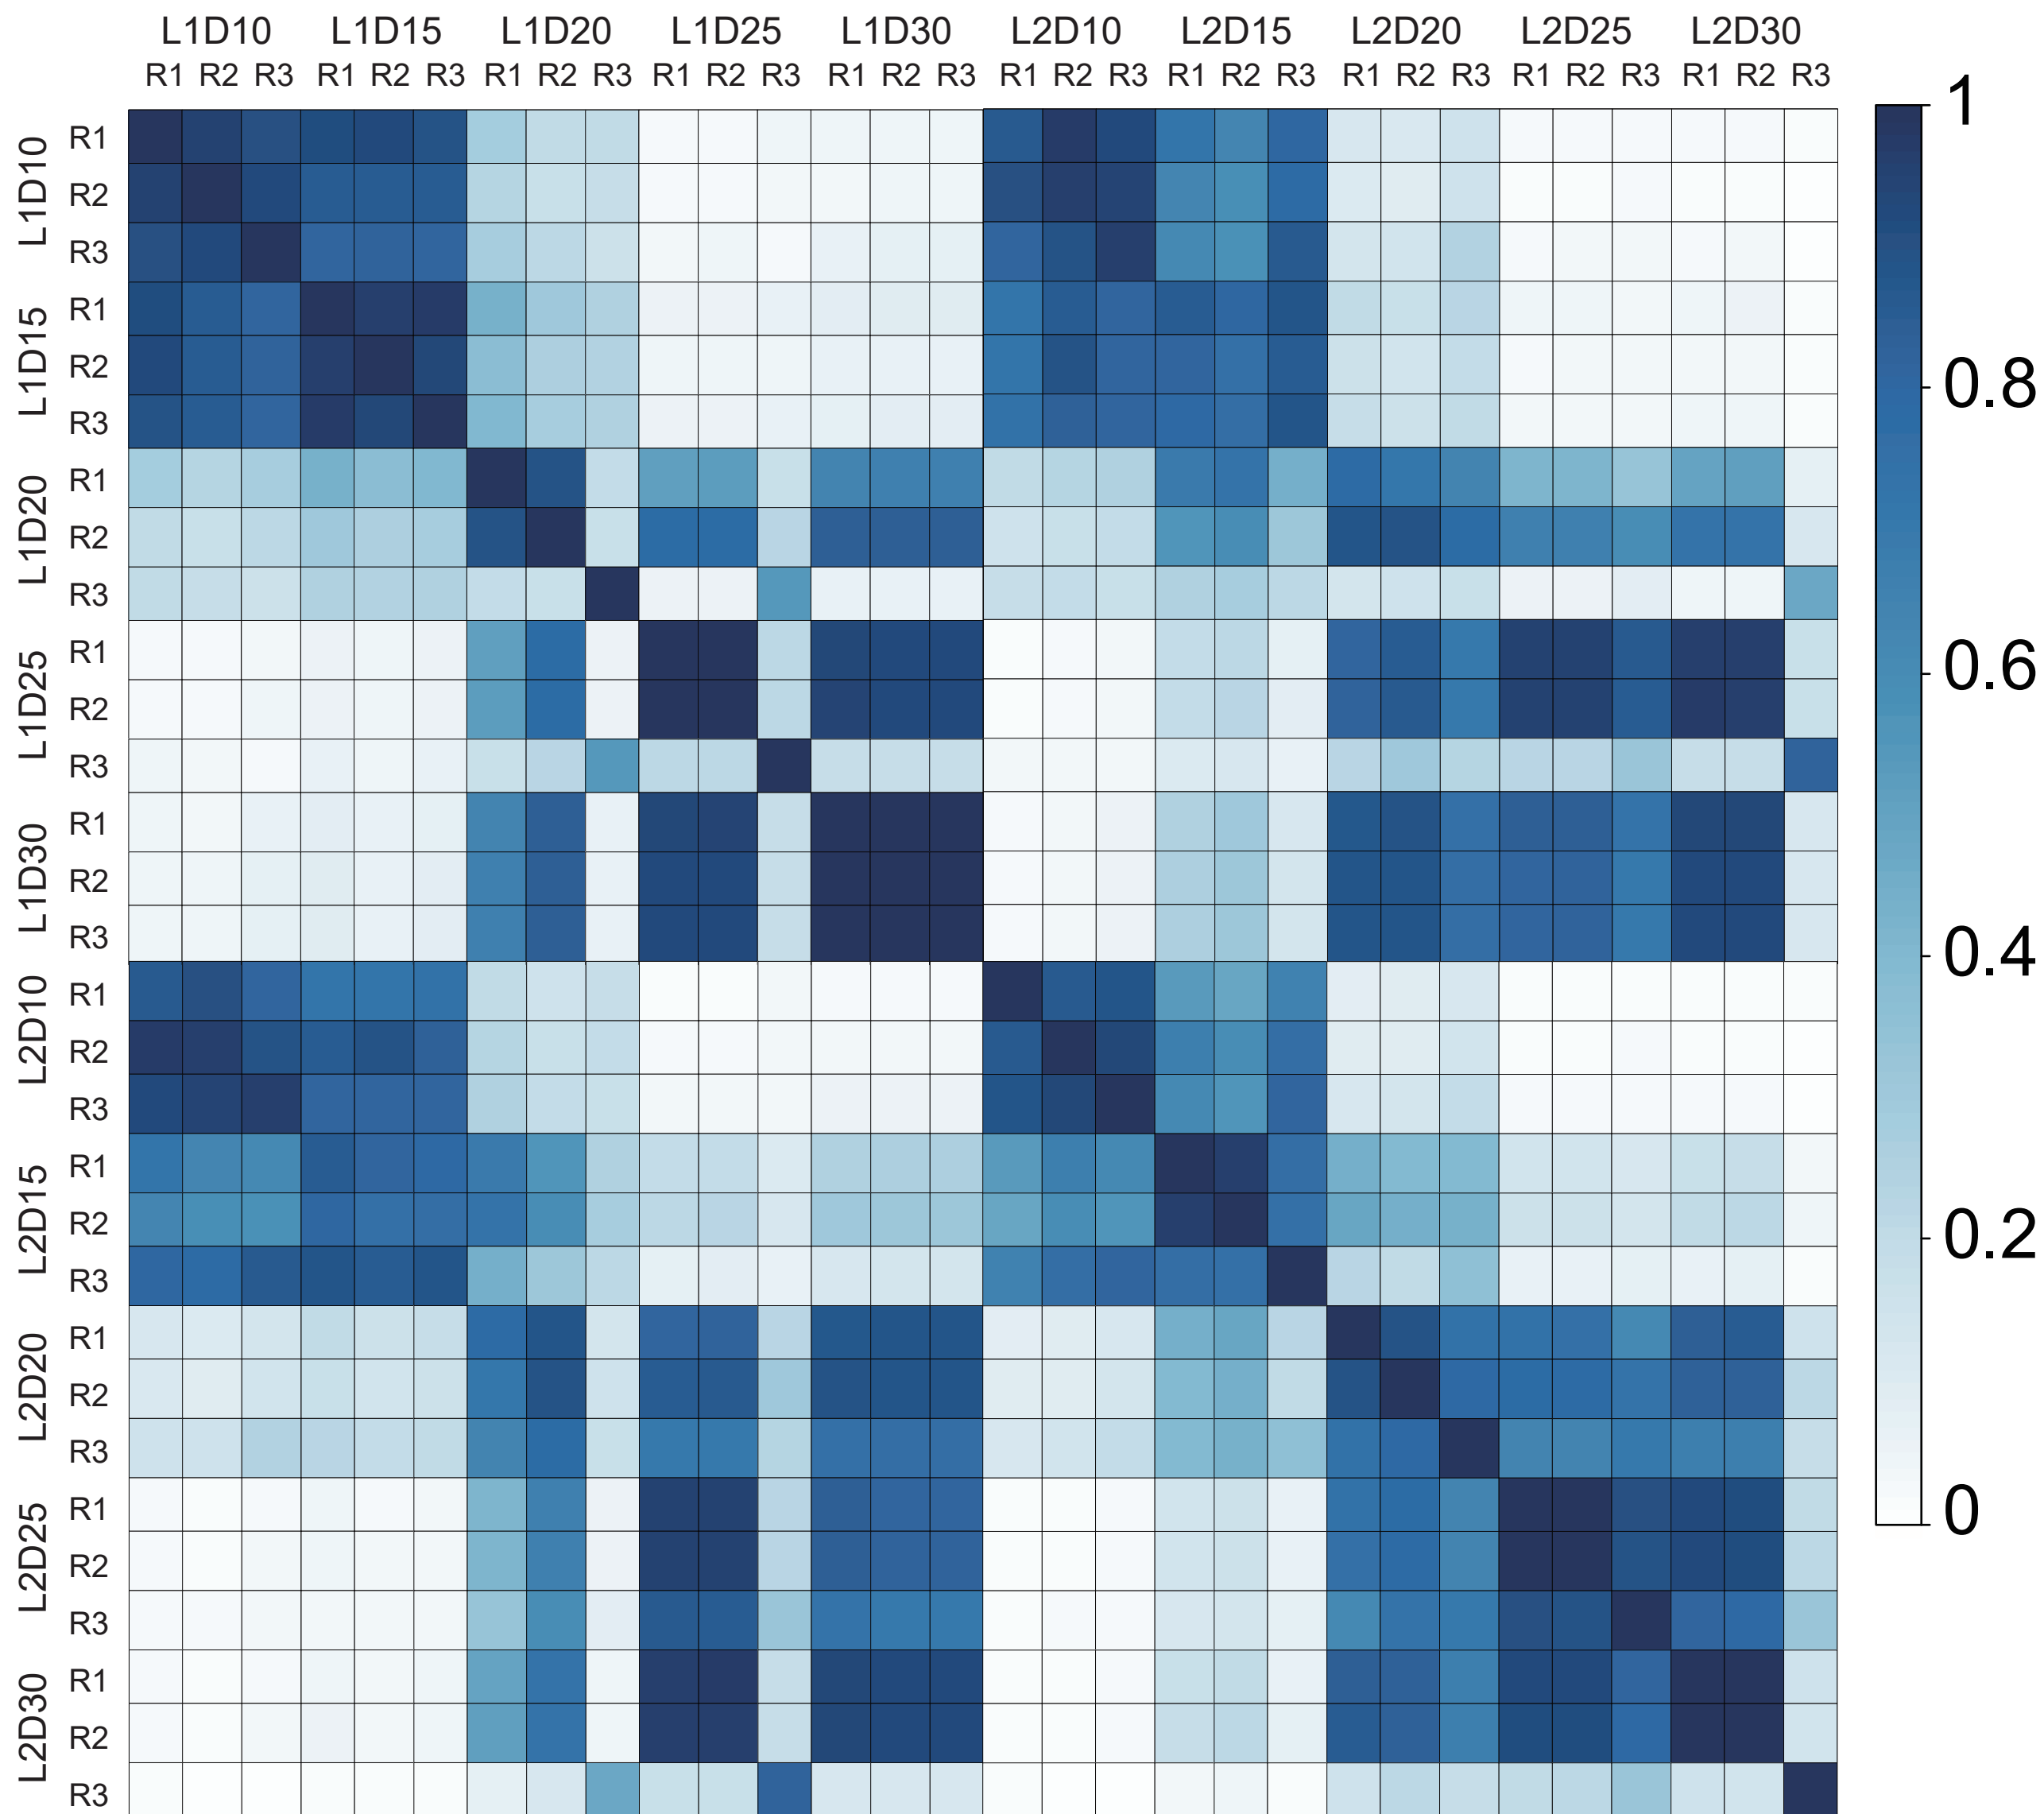

Supplement: s1 [file s1]
